# Supplementary material
Source: PubMed Central journal article supplement (PMC3479460)
Supplement: 1207305109_pnas.201207305SI.pdf [file 1207305109_pnas.201207305SI.pdf]

# Supporting Information

McCallister and del Giorgio 10.1073/pnas.1207305109

## SI Methods

**Isolation of Respiratory CO<sub>2</sub>.** The Respiratory Carbon Recovery System (ReCRoS) was designed to quantitatively recover the CO<sub>2</sub> derived from bacterial respiration after incubation of freshwater samples (1) where the background dissolved inorganic carbon (DIC) values have been reduced by >98%. The two-component ReCRoS consists of an airtight incubation system (20 L) for short-term regrowth incubations (2–4 d) of filtered water samples reinoculated with ambient bacteria and a harvest system to recover the respiratory CO<sub>2</sub> produced during these incubations. Extensive preliminary tests confirmed both the quantitative recovery and the isotopic fidelity of the respiratory CO<sub>2</sub> recovered (1, 2). The recovered CO<sub>2</sub> was extracted from ReCRoS traps, expanded on a vacuum extraction line, stripped of residual moisture, and quantified manometrically (0.5 mmol sensitivity; Baratron) before transfer to break seals (1/10 δ<sup>13</sup>C:9/10 Δ<sup>14</sup>C) (1).

**Incubations to Correct for Macrophyte-Derived Organic Carbon to Respiratory CO<sub>2</sub> Signature in Des Monts.** To assess the relative bioavailability of terrestrial vs. macrophyte-derived organic carbon (OC), bioassays of single-source leachates were conducted. Soil, litter, and macrophyte samples were collected and leached in triplicate in deionized water for 24 h in the dark at room temperature on a shaker table. The leachate was then passed through a combusted (525 °C for 4 h) Millipore AE glass fiber filter (1.0-mm nominal pore size) to remove particulates. Samples were inoculated with a 10% bacterial inoculum, which consisted of a whole water sample filtered through a combusted Millipore AE glass fiber filter to exclude particles and not the microbial consortium. The leachates were incubated in the dark for 14 d in nonnutrient limiting conditions, and the percent bioavailable dissolved organic C (DOC) was calculated from initial and final DOC concentrations. Approximately 18 ± 3% of the soil/litter-derived DOC was bioavailable compared with 60 ± 5% of macrophyte-derived DOC.

**Natural Abundance (δ<sup>13</sup>C and Δ<sup>14</sup>C) Isotopic Analysis.** Subsamples of acidified bulk particulate C and lyophilized DOC were transferred to combusted (500 °C) quartz tubes (6-mm diameter), sealed under vacuum, and combusted at 900 °C using a CuO/Ag metal catalyst to CO<sub>2</sub> (3). Samples for Δ<sup>14</sup>C DIC were acidified using 85% H<sub>3</sub>PO<sub>4</sub>. The sample was sparged using UHP N<sub>2</sub> gas, and the evolved CO<sub>2</sub> was collected cryogenically, purified on a vacuum extraction line at G. G. Hatch Laboratory, University of Ottawa, and collected in a break-seal tube. The CO<sub>2</sub> from break seals was subsequently reduced to graphite in an atmosphere of H<sub>2</sub> over cobalt catalyst (4). Graphite targets were analyzed at the Center for Accelerator Mass Spectrometry at Lawrence Livermore National Laboratory. Δ<sup>14</sup>C is defined as the (per million) deviation of a sample from the <sup>14</sup>C activity of a 1950 standard corrected for fractionation using the sample δ<sup>13</sup>C (5). Total measurement uncertainties for Δ<sup>14</sup>C analyses of these samples were typically ±5%.

## SI Results and Discussion

**Ranges in Age of Aquatic Respiratory CO<sub>2</sub> Estimated by Indirect Approaches.** Measurements of the age of C respired in aquatic systems are scarce compared with measurements from terrestrial systems. This scarcity is, in part, because of much lower respiration rates in aquatic systems relative to terrestrial rates. Fur-

thermore, the bicarbonate buffering system provides the added analytical challenge of discerning small changes in CO<sub>2</sub> superimposed on a much greater background of DIC [CO<sub>2</sub>(aq) + HCO<sub>3</sub><sup>-</sup> + CO<sub>3</sub><sup>2-</sup>]. Resolution of the isotopic signature of respiratory CO<sub>2</sub> in aquatic systems is further complicated by internal [CO<sub>2</sub>(aq), HCO<sub>3</sub><sup>-</sup>, and CO<sub>3</sub><sup>2-</sup>] and external (aquatic and atmospheric) exchanges and isotopic fractionations (1).

Table S1 presents all of the estimates of the age of C respired in aquatic systems determined by indirect approaches and an overview of regional measurements of the age of C respired in terrestrial systems for comparison. The few studies that have explored the age of C cycling through freshwater systems have focused primarily on bulk inorganic C and OC pools. Using a combined <sup>13</sup>C and <sup>14</sup>C analysis of the DIC pool, the work by Mayorga et al. (6) suggested that the CO<sub>2</sub> efflux in the lower Amazon basin was supported primarily by OC fixed within the last 5 y. In contrast, mineralization of ancient OC (8,000–16,650 y B.P.) in the riparian zone of streams in the Pawcatuck River watershed (Rhode Island, United States) may have comprised 50–100% of the OC respired in experimental incubations (7).

More recently, studies have been conducted to measure the age of CO<sub>2</sub> evaded from streams and rivers, and they suggest that the C evaded may range from 400 to 2,000 y B.P. (8, 9). However, the age of C evaded is not solely a result of in situ bacterial respiration and may contain contributions from allochthonous inputs of soil CO<sub>2</sub>, groundwater DIC, and mineral weathering, which obscure the ability to elucidate the bacterial respiratory component. Collectively, these studies suggest a wide range of potential ages of the OC processed in aquatic systems but have further highlighted major difficulties in determining the age of respired OC fueling the CO<sub>2</sub> flux using indirect approaches, which include additive errors inherent in isotopic mass balances (1, 2, 6, 10) and other confounding factors such as local chemistry (6, 7, 11).

**Recent Evidence to Suggest That Old and Stable Organic Matter Is Not Chemically Recalcitrant and Biologically Unavailable.** For over a decade, the terrestrial C cycling community has been evaluating the age of C respired in various biomes (12), whereas the direct measurement of the age of respiratory CO<sub>2</sub> in aquatic systems has lagged behind until this study. In part, the disparities of progress in terrestrial vs. aquatic systems are because of the difficulties discussed above. Logically, the age of OC would seem to provide a plausible assessment of its bioavailability given the supposition that OC persists as a result of its chemical recalcitrance. However, a re-occurring theme in terrestrial research (12–15) and a recently emerging theme in aquatic OC cycling (7, 16–19) is the decoupling between age and bioavailability as a result of (i) mineral association and protection from enzymatic attack (14, 15, 20, 21) and (ii) energy limitation with subsequent priming of preaged OC metabolism by inputs of fresh OC (15, 16, 21–25). For example, the work by Caraco et al. (18) recently showed that zooplankton in the Hudson River could be consuming a C source that is between 3,400 and 50,000 y B.P. The priming effect theory, which was initially hypothesized to operate in terrestrial systems (24), was later substantiated with dual isotope tracing experiments that increased deep soil mineralization and released carbon that had been stored for over 2,000 y B.P. (22). Our own direct measurement of 1,000–3,000 y B.P. OC respired in northern lakes provides unmistakable evidence that similar processes may be operating in aquatic systems (21, 23).

1. McCallister SL, Guillemette F, del Giorgio PA (2006) A system to quantitatively recover bacterioplankton respiratory CO<sub>2</sub> for isotopic analysis to trace sources and ages of organic matter consumed in freshwaters. *Limnol Oceanogr Methods* 4:406–415.
2. McCallister SL, del Giorgio PA (2008) Direct measurement of the δ<sup>13</sup>C signature of carbon respired by bacteria in lakes: Linkages to potential carbon sources, ecosystem baseline metabolism, and CO<sub>2</sub> fluxes. *Limnol Oceanogr* 53:1204–1216.
3. Sofer Z (1980) Preparation of carbon dioxide for stable carbon isotope analysis of petroleum fractions. *Anal Chem* 52:1389–1391.
4. Vogel JS, Nelson DE, Southon JR (1987) 14C background levels in an accelerator mass spectrometry system. *Radiocarbon* 29:323–333.
5. Stuiver M, Polach HA (1977) Discussion: Reporting of C14 data. *Radiocarbon* 19: 355–363.
6. Mayorga E, et al. (2005) Young organic matter as a source of carbon dioxide outgassing from Amazonian rivers. *Nature* 436:538–541.
7. Gurwick NP, et al. (2008) Mineralization of ancient carbon in the subsurface of riparian forests. *J Geophys Res*, 10.1029/2007JG000482.
8. Billett MF, Garnett MH, Harvey F (2007) UK peatland streams release old carbon dioxide to the atmosphere and young dissolved organic carbon to rivers. *Geophys Res Lett* 34:L23401.
9. Zeng FW, Masiello CA (2010) Sources of CO<sub>2</sub> evasion from two subtropical rivers in North America. *Biogeochemistry*, 10.1007/s10533-010-9417-6.
10. Trumbore S (2006) Carbon respired by terrestrial ecosystems—recent progress and challenges. *Glob Change Biol* 12:141–153.
11. Cole JJ, Caraco NF (2001) Carbon in catchments: Connecting terrestrial carbon losses with aquatic metabolism. *Mar Freshw Res* 52:101–110.
12. Trumbore S (2000) Age of soil organic matter and soil respiration: Radiocarbon constraints on belowground C dynamics. *Glob Change Biol* 12:141–153.
13. Trumbore S (2009) Radiocarbon and soil carbon dynamics. *Annu Rev Earth Planet Sci* 37:47–66.
14. Lutzow MV, et al. (2006) Stabilization of organic matter in temperate soils: Mechanisms and their relevance under different soil condition—a review. *Eur J Soil Sci* 57:426–445.
15. Kleber M, et al. (2011) Old and stable soil organic matter is not necessarily chemically recalcitrant: Implications for modeling concepts and temperature sensitivity. *Glob Change Biol* 17:1097–1107.
16. McCallister SL, Bauer JE, Cherrier J, Ducklow HW (2004) Assessing the sources and ages of organic matter supporting estuarine bacterial production: A novel multiple isotope (δ<sup>13</sup>C, δ<sup>15</sup>N, Δ<sup>14</sup>C) approach. *Limnol Oceanogr* 49:1687–1702.
17. Hood E, et al. (2009) Glaciers as a source of ancient and labile organic matter to the marine environment. *Nature* 462:1044–1047.
18. Caraco N, Bauer JE, Cole JJ, Petsch S, Raymond P (2010) Millennial-aged organic carbon subsidies to a modern river food web. *Ecology* 91:2385–2393.
19. Griffith DR, Raymond PA (2011) Multiple-source heterotrophy fueled by aged organic carbon in an urbanized estuary. *Mar Chem* 124:14–22.
20. Ekschmitt K, Liu M, Vetter S, Fox O, Wolters V (2005) Strategies used by soil biota to overcome soil organic matter stability—why is dead organic matter left over in the soil? *Geoderma* 128:167–176.
21. Bianchi TS (2011) The role of terrestrially derived organic carbon in the coastal ocean: A changing paradigm and the priming effect. *Proc Natl Acad Sci USA* 108: 19473–19481.
22. Fontaine S, et al. (2007) Stability of organic carbon in deep soil layers controlled by fresh carbon supply. *Nature* 450:277–280.
23. Guenet B, Danger M, Abbadie L, Lacroix G (2010) Priming effect: Bridging the gap between terrestrial and aquatic ecology. *Ecology* 91:2850–2861.
24. Kuzyakov Y, Friedel JK, Stahr K (2000) Review of mechanisms and quantification of priming effects. *Soil Biol Biochem* 32:1485–1498.
25. Kuzyakov Y (2010) Priming effects: Interactions between living and dead organic matter. *Soil Biol Biochem* 42:1363–1371.

**Table S1. Summary of ages of C respired by bacteria in aquatic systems and comparison with soils**

| Region                                    | System                          | Age of C metabolized         | Method                                                                 | Ref.       |
|-------------------------------------------|---------------------------------|------------------------------|------------------------------------------------------------------------|------------|
| <b>Aquatic</b>                            |                                 |                              |                                                                        |            |
| Amazon River (Brazil)                     | River (floodplain)              | Modern (<5 y)                | <sup>14</sup> C mass balance                                           | 1          |
| Spring Creek (United States)              | River                           | Modern (years-decades)       | <sup>14</sup> C-DIC                                                    | 2*         |
| York River (United States)                | River (mainstem)                | Modern                       | <sup>14</sup> C-DIC from long-term incubations                         | 3          |
| Hudson River (United States)              | River (mainstem)                | 1,000–5,000 y B.P.           | Modeled from system metabolic balance                                  | 4          |
| Hudson River (United States)              | River (mainstem)                | Preaged (hundreds-thousands) | <sup>14</sup> C mass balance of C pools                                | 5          |
| Hudson River (United States)              | River (mainstem)                | ~20,120 y B.P.               | Isotopic mixing curves ( <sup>14</sup> C, <sup>13</sup> C)             | 6          |
| Pawcatuck River (United States)           | Riparian zone                   | 4,000–16,663 y B.P.          | <sup>14</sup> C-DIC                                                    | 7          |
| Eastern Township (Canada)                 | Lakes (epilimnion)              | 1,000–3,000 y B.P.           | In vitro measurement of respiratory CO <sub>2</sub>                    | This study |
| Northern Peatland (United Kingdom)        | Streams                         | 850–1,455 y B.P.             | <sup>14</sup> C of evaded CO <sub>2</sub>                              | 8          |
| Gulf of Alaska (United States and Canada) | Streams (glacial watersheds)    | 3,900 y B.P.                 | Regression of percent labile DOC and Δ <sup>14</sup> C-DOC             | 9          |
| Arctic (Siberia)                          | Thermokarst lakes               | >35,000 y B.P.               | <sup>14</sup> C of evaded CH <sub>4</sub>                              | 10         |
| <b>Soils</b>                              |                                 |                              |                                                                        |            |
| Manitoba (Canada)                         | Boreal soil                     | 30 y                         | <sup>14</sup> C of evaded CO <sub>2</sub>                              | 11         |
| Massachusetts (United States)             | Temperate soil                  | 8 y                          | <sup>14</sup> C of evaded CO <sub>2</sub>                              | 11         |
| Eastern Amazonia (Brazil)                 | Tropical soil                   | 3 y                          | <sup>14</sup> C of evaded CO <sub>2</sub>                              | 11         |
| Massif Central (France)                   | Deep grassland soil (0.6–0.8 m) | 2,570 y B.P.                 | <sup>14</sup> C of evolved CO <sub>2</sub> from laboratory incubations | 12         |
| Langlands Moss (United Kingdom)           | Deep Peat (100–400 cm)          | 975–4,000 y B.P.             | In situ passive sampling                                               | 13         |
| Arctic                                    | Tundra soil                     | 1,990–4,020 y B.P.           | <sup>14</sup> C-evaded CO <sub>2</sub>                                 | 14         |

\*Buffalo Bayou was excluded as significant. CaCO<sub>3</sub> from pedogenic carbonate, crushed limestone/dolomite, and oyster shell contributed to the age of the DIC relative to respiration.

1. Mayorga E, et al. (2005) Young organic matter as a source of carbon dioxide outgassing from Amazonian rivers. *Nature* 436:538–541.
2. Zeng FW, Masiello CA (2010) Sources of CO<sub>2</sub> evasion from two subtropical rivers in North America. *Biogeochemistry*, 10.1007/s10533-010-9417-6.
3. Raymond PA, Bauer JE (2001) Riverine export of aged terrestrial organic matter to the North Atlantic Ocean. *Nature* 409:497–500.
4. Cole JJ, Caraco NF (2001) Carbon in catchments: Connecting terrestrial carbon losses with aquatic metabolism. *Mar Freshw Res* 52:101–110.
5. Raymond PA, et al. (2004) Controls on the variability of organic matter and dissolved inorganic carbon ages in northeast US rivers. *Mar Chem* 92:353–366.
6. Griffith DR, Raymond PA (2011) Multiple-source heterotrophy fueled by aged organic carbon in an urbanized estuary. *Mar Chem* 124:14–22.
7. Gurwick NP, et al. (2008) Mineralization of ancient carbon in the subsurface of riparian forests. *J Geophys Res*, 10.1029/2007JG000482.
8. Billett MF, Garnett MH, Hardie SML (2006) A direct method to measure <sup>14</sup>CO<sub>2</sub> lost by evasion from surface waters. *Radiocarbon* 48:61–68.
9. Hood E, et al. (2009) Glaciers as a source of ancient and labile organic matter to the marine environment. *Nature* 462:1044–1047.
10. Walter KM, Zimov SA, Chanton JP, Verbyla D, Chapin FS, 3rd (2006) Methane bubbling from Siberian thaw lakes as a positive feedback to climate warming. *Nature* 443:71–75.
11. Trumbore S (2000) Age of soil organic matter and soil respiration: Radiocarbon constraints on belowground C dynamics. *Glob Change Biol* 12:141–153.

12. Fontaine S, et al. (2007) Stability of organic carbon in deep soil layers controlled by fresh carbon supply. *Nature* 450:277–280.
13. Garnett MH, Hardie SML (2009) Isotope ( $^{14}\text{C}$  and  $^{13}\text{C}$ ) analysis of deep peat  $\text{CO}_2$  using a passive sampling technique. *Soil Biol Biochem* 41:2477–2483.
14. Schuur EAG, et al. (2009) The effect of permafrost thaw on old carbon release and net carbon exchange from tundra. *Nature* 459:556–559.

**Table S2. Lake characteristics**

| Water body   | Total nitrogen ( $\text{mg L}^{-1}$ ) | pH  | Alkalinity ( $\mu\text{eq L}^{-1}$ ) | Maximum depth (m) | Surface lake area ( $\text{km}^2$ ) | Temperature at sampling ( $^{\circ}\text{C}$ ) |
|--------------|---------------------------------------|-----|--------------------------------------|-------------------|-------------------------------------|------------------------------------------------|
| Bran de Scie | 0.29                                  | 7.3 | 493                                  | 7.6               | 0.1                                 | 20.5                                           |
| Des Monts    | 0.33                                  | 7.7 | 402                                  | 6.1               | 0.3                                 | 20.9                                           |
| Stukely      | 0.16                                  | 7.5 | 320                                  | 30.0              | 4.0                                 | 20.9                                           |
| Bowker       | 0.10                                  | 7.2 | 236                                  | 60.0              | 2.5                                 | 20.3                                           |
| Fraser       | 0.25                                  | 7.1 | 303                                  | 18.9              | 1.6                                 | 19.8                                           |
